# Supplementary material for: Analysis of Mutations in Neurospora crassa ERMES Components Reveals Specific Functions Related to β-Barrel Protein Assembly and Maintenance of Mitochondrial Morphology
Source: PubMed Central journal article supplement (PMC3733929; doi:10.1371/journal.pone.0071837), 2013-08-05
Supplement: pone.0071837.s001.pdf [file pone.0071837.s001.pdf]

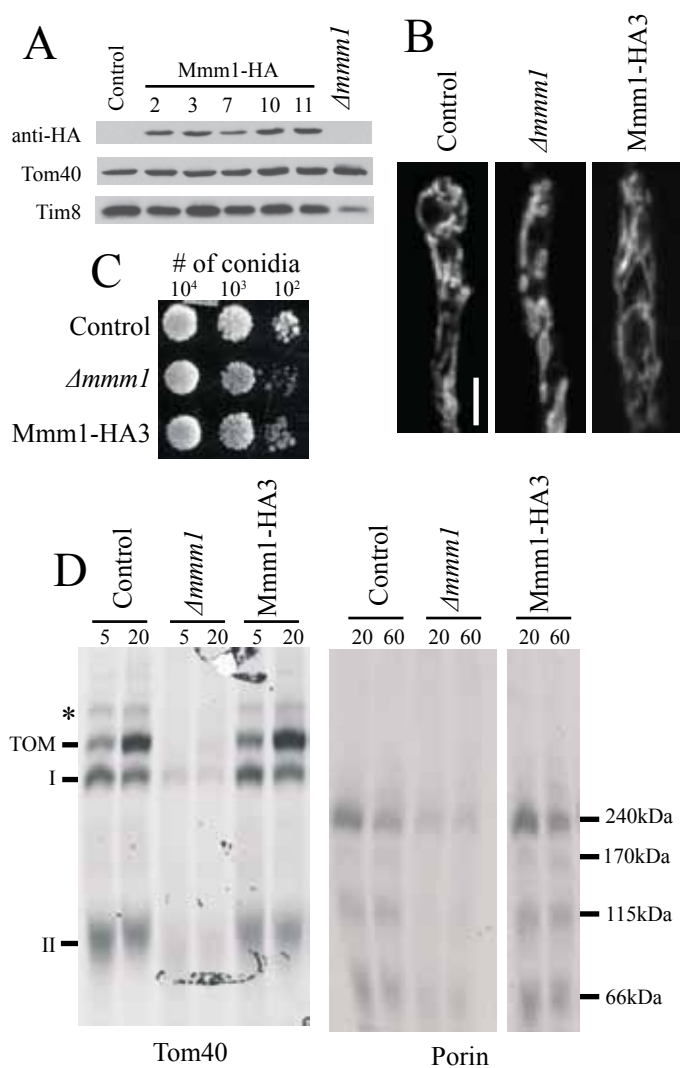

**SUPPORTING INFORMATION FIGURE S1.** Mmm1-HA rescues  $\Delta mmm1$  phenotypes. A. Mitochondria isolated from the indicated transformant strains were subjected to SDS-PAGE and analyzed by Western blot for detection of the indicated proteins. B. The control  $\Delta mmm1$  and Mmm1-HA3 strains were grown on solid Vogel's media, stained with MitoTracker Green FM and examined by confocal fluorescence microscopy. Bar indicates 10  $\mu\text{m}$ . C. Conidiospores from the indicated strains were spotted as tenfold dilutions on Vogel's sorbose medium plates. Plates were incubated at 30°C for 48h. D. Assembly of Tom40 and Porin. Radiolabeled precursors were incubated with isolated mitochondria for the indicated times. Mitochondria were then reisolated and dissolved in 1% digitonin. The samples were subjected to BNGE, transferred to PVDF membrane and analyzed by autoradiography. The mature TOM complex and intermediates I and II are indicated. The four major complexes containing radiolabeled porin are indicated by their estimated molecular masses.
