# Supplementary material for: Analysis of Mutations in Neurospora crassa ERMES Components Reveals Specific Functions Related to β-Barrel Protein Assembly and Maintenance of Mitochondrial Morphology
Source: PubMed Central journal article supplement (PMC3733929; doi:10.1371/journal.pone.0071837), 2013-08-05
Supplement: pone.0071837.s003.pdf [file pone.0071837.s003.pdf]

**SUPPORTING INFORMATION FIGURE S3.** Alignment of fungal Mmm1 proteins. Conserved cysteines are shaded in grey. A116-124 is shaded in grey in the *N. crassa* protein. The membrane spanning domain of the *N. crassa* protein is underlined and shaded in grey. Residues in the C.g. sequence resulting from a potential missed intron are highlighted. Abbreviations: N.c., *Neurospora crassa*; G.z., *Gibberella zeae*; C.g., *Chaetomium globosum*; S.m., *Sordaria macrospora*; M.o., *Magnaporthe oryzae*; P.a., *Podospora anserina*; F.o. *Fusarium oxysporum*; V.d., *Verticillium dahliae*; A.n., *Aspergillus nidulans*; *Trichophyton tonsurans*; C.i., *Coccidioides immitis*; P.b., *Paracoccidioides brasiliensis*; S.s., *Sclerotinia sclerotiorum*; B.f., *Botryotinia fuckeliana*; P.t., *Pyrenophora teres*; S.c., *Saccharomyces cerevisiae*; *Kluyveromyces lactis*; C.a., *Candida albicans*; S.p., *Schizosaccharomyces pombe*; U.m., *Ustilago maydis*; C.n., *Cryptococcus neoformans*; R.o., *Rhizopus oryzae*; B.d., *Batrachochytrium dendrobatidis*.

```

N.c. -----
G.z. -----
C.g. -----
S.m. -----
M.o. -----
P.a. -----
F.o. -----
V.d. -----
A.n. -----
T.t. -----
C.i. -----
P.b. -----
S.s. -----
B.f. -----
P.t. -----
S.c. -----MTDSENESTETDLSIMTFDDYISKELPEHLQRLIMENLKGSTTNDLKQTSNNSEFN 55
K.l. MEMSELLASEVVS SGPDYAKKSV DGLNMTAANGTNDT LMT-LDEYLNKSLPLHLEQLILD 59
C.a. -----MSQDLIETTATTTKIVEAR-----ELGHQIHDSLLEQLKLQQ-EELLQQQRDLFFQ 50
S.p. -----
U.m. -----
C.n. -----
R.o. -----
B.d. -----

```

```

N.c. -----MADICPSRSEP-----TLSFTQGLI 20
G.z. -----MAGDTCQPTEP-----TLSFTQGLI 21
C.g. -----MARDVCP TNSEP TVSRRVVPTLRLRGWDVNVANCRWVYRLSFTQGLI 46
S.m. -----MADICPARSEP-----TLSFTQGLI 20
M.o. -----MTPDSCPVRPEP-----TLSFTQGLI 21
P.a. -----MAQDVCPTRSEP-----SLSFLQGLI 21
F.o. -----MEADTCPRLIEP-----TLSFTQGLI 21
V.d. -----MADKTCPATSEP-----TLSFAQGLV 21
A.n. -----MAFQQGTPGPPVELCSTFTDHDE-----TVSSLSFTQGF 35
T.t. -----MSSPENASCP-----PPQHLSFTQGLL 23
C.i. -----MSN--DTSAQ-----PAQSLSFTQGLL 21
P.b. -----MAGSTSASLQTPYFPSSTQINPVRVDHTLPLPPSQPSLSFTQGLL 45
S.s. -----MWLDDVAS-----ELSFTQGLL 17
B.f. -----MTIPAPIPKAES-----SLSFTQGLL 22
P.t. -----MAEEVPTAVPLATPAGSS-----SLSFTQGF 27
S.c. VSKNGSFKGLDDAIQALQMQSVLHPS-----SLGSLATSSKFSGWSFAQGF 102
K.l. ANQKELFDSAAKSLLSSTLLAKQQQSL-----QIAPIQPQSSFSQSFAEGLI 107
C.a. EQQ-----LQLQQQVTQP-----VSNNGNTWSFTQGLV 78
S.p. -----MIHLPQG-----SFTQGLI 14
U.m. -----MQQPQQDLQIGLPYAPVQPPIPSPAAYFAYLPSPSRWTFTQGLI 45
C.n. -----MSETFSPNLTFTEGFV 16
R.o. -----

```

B.d.

-----

N.c. LGQLSVVLLLAAFIKFFIFGDPPSPEVVASIRATDRRSRTLAHKKS-----ILSLRETN 74  
G.z. VGQLSVVLLVLAAFIKFFIFGDPPSPDVTASLRATERRSRTLAHKRS-----LLSLRSPG 75  
C.g. LGQISVVLLIAAFIKFFIFGDPPSPEITASIRAAERRSRTLAHKRS-----LLSLRESS 100  
S.m. LGQLSVVLLLAAFIKFFIFGDPPSPEVVASIRATDRRSRTLAHKKS-----ILSLRETN 74  
M.o. VGQISVVVLLIAAFIKFFIFGDPPSAEETASLRASERRSRTLAHKKS-----LLSLRTSN 75  
P.a. LGQLSVVLLIAAFIKFFIFGEAPSAEETASIRATERRSRTLAHKKS-----LLSLRSAA 75  
F.o. VGQLSVVLLVLAAFIKFFIFGDPPSADVTASLRATERRSRTLAHKRS-----LLSIRSPA 75  
V.d. LGQLSVVLLVLAAFIKFFIFGDPPSPEVTASLRATERRSRTLAHKKS-----LVGLRAAT 75  
A.n. LGQLSVVLLIGAFIKFFIFGEAPPPSRG--LRASTHRRSNSIFS--QDAPPPRSREKP 91  
T.t. LGQLSVVLLIGAFIKFFIFGEAPSSSSRGISQRAAPRKRSYSANSTLFRDAASRLKESA 83  
C.i. VGQLSVVLLIGAFIKFFIFGEASPPSSRSQTRRTSPHKRSYSISG--ARDLGSRSLEKEP 79  
P.b. VGQLSVVLLIGAFIKFFIFGEAPPPSRGLSNRTSTHPRSYSINAA-STDSSPRPLREKP 104  
S.s. LGQLSIVILIGAFIKFFIFGDPPSPDVSAALRATERRSRTLAHKRS-----LLTLRSST 71  
B.f. LGQLSIVILIGAFIKFFIFGDPPSPDVTAALRATERRSRTLAHKRS-----LLTLRSST 76  
P.t. LGQLSIAILIFCFIKFFIFGDEPSADDRALHLNLSLRRARTLAHQQS-----YKQLQTRA 81  
S.c. VGQLSIVLLIFFFLKFFIFGDEPSKSNPKPAASRHRSKFKEYPFI-----SRE 151  
K.l. VGQLSVIVALIFVIKFFVFSEGGTKTATAKSVGS--ASSFMS--T-----KNS 152  
C.a. IGQVSVIFIIIVFVKFFVFADSSSHIPKPLDG--ATGVIVK-----RNK 122  
S.p. VGQLLTLAIIVVFLRFFFCSPIPKSVANSFKQTGNETPDETPSTP-----60  
U.m. VGQVSMVIVALLLIRYVIFEDSATALEKERLMLKVSQRRSKLHAKALLQDARKANSAAA 105  
C.n. LGQASFLIILLFIRYVVFSPSEQIDHEG-----WRKRR 50  
R.o. -----MLLVQKARYIPSRPSLN-----TAP 20  
B.d. -----MHQRIAVSKPK-----PVS 14

N.c. ALQLVQNP----ALNKKH--VLRPG---PPILTIGSILSKTYKVDSHQPESLDWFNVII 125  
G.z. NR----QDR---ELNRKKSTVLRN----PPALTIGSILSKTYYNVDSHQPESLDWFNVII 124  
C.g. TRRAGQQP----TLNRKKSSILRPS---PPPLTIGSILDKTYKVDSHQPESLDWFNVII 153  
S.m. ALQLVQNP----ALNKKH--VLRPG---PPTLTIGSILSKTYKVDSHQPESLDWFNVII 125  
M.o. QRPGSQQQQS--VLNRKKSSILRSG---PPSLTIGSILNKTYRVESHQPESLDWFNVII 130  
P.a. TQRQGSQPPALPALNKKKSSILRSN---PPTLTIGSILDKTYKVDSHQPESLDWFNVII 132  
F.o. NRGDRSQDR---SLSRKKSTVLRN----PPTLTIGSILSKAYYNVDSHQPESLDWFNVII 128  
V.d. GR---PGQP---SLNKKKSSVLRN----PYNLTIGSILSKTYYNVDSHQPESLDWFNVII 125  
A.n. STSNVLRPVP--SSATNTRSILRKTYYSAPNPNS---SKHRIHHSSHQPESLDWFNVII 146  
T.t. S-SNVLRPVP--SSSTNKSILRKTYYNAPTNFQ--KNGRNLHHSTHQPESLDWFNVII 139  
C.i. S-SNVLRPVP--SSSTNTRSILRKTYYSANPTNFTSKHGRHRPHSTHQPESLDWFNVII 136  
P.b. STSNILRPVP--SSSTNTRSILRKTYYSATPHPTPKHGRPRLYHSSHQPESLDWFNVII 162  
S.s. PRHASQS-----LNRKRSSVLRN----PAPLTTNAILSKTYYNVDSHQPESLDWFNVII 121  
B.f. PRRASQP-----LNRKRSSVLRN----PAPLTTNAILSKTYYNVDSHQPESLDWFNVII 126  
P.t. NSTSLSLR-----HKPSTSIRKGEETRGGPSIATILAKTYYNVKGHQPESLDWFNVII 135  
S.c. FLTSLVRKGA-----KQHYELNEEAENEHLQELALILEKTYYNVDVHPAESLDWFNVI 205  
K.l. ILSTIIKRG-----KDGLEVDK-DNEKSRQINSILEKTYYNVETHSPESLDWFNVI 205  
C.a. NKKHSNGQFA-----NDGENEDDTSLDNSQSKISSILEKTYYNVNNHASESLDWFNVI 176  
S.p. -----LSNKKRYKPLTILEPHILNLLYDVNEHEPESLDWFNVI 101  
U.m. SAAAAAAPSP----ASHPLRKSHRLASDTRAMFANILDKTAYDLSSHLPEADWLVNMF 161  
C.n. AERADLLSN-----HTPPPLSNLLSKTSYDMSIHPAESSDWVNVLL 91  
R.o. SVAAAAALPN-----DHITLTKTYDVIIHPPPESTDWLVNLL 55  
B.d. AQQRRRTIDS-----LILGKIYNTSQHPFESCNWLNILI 48

\* \*\* :\*.\*.:. .

N.c. AQTIAQFRSDA-----QHDDAILSSLSKALNG-----TARPDFLD 160  
G.z. GQTIAQFRSDA-----QHDDAILDLSLTKALNG-----GSRPDFID 159  
C.g. AQTIAQFRSDA-----QHDDAILTSLTKALNG-----TSRPDFVD 188  
S.m. AQTIAQFRSDA-----QHDDAILSSLSKALNG-----TARPDFLD 160  
M.o. AQTIAQFRSDA-----QHDDAILTSLTKALNG-----TSRPDFLD 165  
P.a. AQTIAQFRSDA-----QHDDAILTSLTKALNG-----TSRPDFVD 167  
F.o. AQTIAQFRSDA-----QHDDAILDLSLTKALNG-----DSRPDFID 163  
V.d. AQTIAQFRSDA-----QHDDAILSSLTKALNG-----TSRPDFVD 160  
A.n. AQTIAQYRQTAYLLKDSPTSSILHSLTAALNNP-----EKKPSFID 187  
T.t. AQLIAQYRQTAYLLKDSPTSSILDSTLDTLNNV-----EKKPSWID 180

C.i. AQTIAQYRQTAYILKDSPTSSILES LATTLNNP-----EKKPSFID 177  
P.b. AQTIAQYRQTAYILKDSPTSSILASLSETLNNP-----EKKPSFID 203  
S.s. AQTIAQFRADA-----QHDDAILTSLTKALNG-----GNRPDFLD 156  
B.f. AQTIAQFRADA-----QHDDAILTSLTKVLNG-----GNRPDFLD 161  
P.t. AQTIAQLRADA-----RQDDAILTSLTEVLNT-----GSKPDWIG 170  
S.c. AQIIQQFRSEA-----WHRDNILHSLNDFIGRKS-----PDLPEYLD 242  
K.l. AQTIHQFREEA-----LQKNNILNSLNDFIERRS-----NELPQYLD 242  
C.a. AQTISQLRSEA-----LLKDNIIYHSLNNFLTN-----AKLPDFID 211  
S.p. AQALIQFRYDA-----CSNDVALRKLETVLNKG-----AQDKSMVD 137  
U.m. AQAIAGYREDVLTGG--VSSHHTASDAIPSPNPLEPQKERTARDLMEEILNRATSSFLD 219  
C.n. AQILQGYRNDLLSEG--GEEGARQRIEGWLNPK-----GENSLWLD 130  
R.o. AQVILQYRQDAS-----INNRMSCALDSVFNSG-----VRPSFVG 90  
B.d. AQFLTLRLTDAEFG-----LKSVSMLDSILNSA-----WKPSFLG 83  
.\* : \*

N.c. EIKVTELSLGEDFPFIFSNCR IIPVDEDGLSFGTGKAFDANMATREGARLQARMDVDLS-D 219  
G.z. EIRVTELSLGEDFPILSNCR IIPVDEDGVS LGHGKKFDPKAARDGTRLQARMDVDLS-D 218  
C.g. EIRVTELSLGEDFPFIFSNCR IIPVDEDGLNLQSGKGLDANMATREGARLQARMDVDLS-D 247  
S.m. EIKVTELSLGEDFPFIFSNCR IIPVDEDGLSFGTGKAFDANMATREGARLQARMDVDLS-D 219  
M.o. EIRVTELSLGEDFPFIFSNCR IIPVDEDGLDFGPGKAFDANMATRDGGTLQARMDVDLS-D 224  
P.a. EIRVSELSLGEDFPFIFSNCR IIPVDEDGLQFGAGKAFDPKQAAREGARLQARMDVDLS-D 226  
F.o. EIRVTELSLGEDFPILSNCR IIPVDEDGVS LAPGKKFDATAARDGLRLQARMDVDLS-D 222  
V.d. EIRVTKLSLGEDFPFIFSNCR IIPVDEDGLSLGNSKTI DASAATREGAKLQARMDVDLS-D 219  
A.n. KITVTDISLGEFFP FIFSNCR IIAVDDP-----MSDGGRLQALLDVMSDD 232  
T.t. RINVTDISIGEEFFP FIFSNCR VIAVDDP-----NSDGGRLQALMDVDLSDD 225  
C.i. DITVTDISLGEFFP FIFSNCR VIAIDDP-----SSDGGRLQALMDVDLSDD 222  
P.b. IIKVTDISLGEFFP FIFSNCR VIAVEDP-----NSDGGRLQALMDVDLSDD 248  
S.s. EIKVTELSLGEDFPFIFSNCR IIPVDEDGITLGR----EGGAAGREHGRLQARMDVDLS-D 211  
B.f. EIKVTELSLGEDFPFIFSNCR IIPVDEDGMTLGR----EGGAAGREHGRLQARMDVDLS-D 216  
P.t. EIKVTEIALGDEFFP FIFSNCR VMPA-EDGFWYGGP-----NTGNDKERLQARMDVDLS-D 222  
S.c. TIKITELDTGDDFP FIFSNCR IQYSP-----NSGNKKLEAKIDIDLN-D 284  
K.l. QIKITEVDIGDDFP FIFSNCR IQYSP-----NSNKKRLEAKIDIDLN-D 284  
C.a. TINLTEIDIGDDFP FIFSNCR IKYG-----EDLKRLEAKIDVDLS-D 251  
S.p. HIYVRDLSLGDGFPVFSHCRVLP HQHN-----SSQLRAEMLVSLT-D 178  
U.m. PIRVTEADFGDAYPIFTNARVRPADDT-----GRTRIEIDVDYS-D 259  
C.n. PIDVTSLSLGTSYPLLSNARIRPADGQ-----GRLRAEIDVDYL-D 170  
R.o. PIHVTELNLGQEFPIFSRARIRPSDEA-----GSTRAEIDFEYS-D 130  
B.d. DISITNFSLGE EYPTLKNARVFAEPE-----SGMKIHVDFSFID-D 123  
\* : . \* : \* : \* : \* : \*

N.c. MITLAVETKLLLNYPKRLSAVLPVALAVSVVRFSGTLSISFIPSN----- 264  
G.z. MLTLAVETKLLLNYPKKLSAVLPVALAVSVVRFSGTLSISFIPSN----- 263  
C.g. MITLAVETKLLLNYPKRLSAVLPVALAVSVVRFSGTLSISFVPSN----- 292  
S.m. MITLAVETKLLLNYPKRLSAVLPVALAVSVVRFSGTLSISFIPSN----- 264  
M.o. MITLALETKLLLNYPKKLTAVLPVALAVSVVRFSGTLAISFIPSN----- 269  
P.a. MITLAVETKLLLNYPKRLSAVLPVALAVSVVRFSGTLSISFNPSN----- 271  
F.o. MLTLAVRTKLILNYPKKLSAVLPVELAVSVIRFSGTLSISFIPSN----- 267  
V.d. LLTLALETKLLLNYPKKLSAVLPVALTVSVRRFSGTLSVSVFIPSN----- 264  
A.n. NLSIAVETSLVLNYPKPCSAI LPVALSISVVRFSGTLCISLVPAS-----T 278  
T.t. NLSLAIETNLLLNYPKPASAVLPVALSVSVVRFSGTLCISFVPSP-----G 271  
C.i. NLSLAIETNLLLNYPKPYSAI LPVALSVSVVRFSGTLCISFVPGT-----T 268  
P.b. NLSLAIETSLLLNYPKPFAVLPVALAVSVVRFSGTLCISFVPGP-----R 294  
S.s. FITLAVETKLLLNYPKPLVAVLPVALAVSVMRFSGTLSISFVPGS----- 256  
B.f. FITLAVETKLLLNYPKPLVAVLPVALAVSVVRFSGTLSISFVPGS----- 261  
P.t. VITIGVETLNLNWPKPMSAVLPVALAVSIVRFSGTLAMSFIPSSPPSTTAPMPSPTCN 282  
S.c. HLTGLVETKLLLNYPKPGIAALPINLVSVIRFQAACLTVSLTN----- 327  
K.l. RLALGIETKLLLNYPKPFAALPIKLTVSVIRFQAACLTVSLTT----- 327  
C.a. TLTLGIATKLLLNYQPRPLTAVLPVALSVIVRFSGCLTVSLINTKDI DLKNVDKTSNMNG 311  
S.p. NINCTVDTKLLLNYPKPAFATLPLSITVRI CKFVGKVSFLTIVYS----- 225  
U.m. QITLAIDTKLLINFPKPRFAVLPVSLGLTIVRFSGTLAIELFSSD----- 304  
C.n. SLSMTLSTAVLVNFPKPRFAVLPVTLGVELVSI GGTMSVQLHEPI----- 215  
R.o. QVTLGIETQLILNWPKQAFVLPVSLVLSVVRFSGTLTIELINP----- 174  
B.d. QLTGLIDTQMLINYPKPGMAALPISIVLSIVKFSGT FVIEFVSKP----- 168

: \* : \* \* : \* \* \* : : : : . . :

N.c. -----PSNNE-----PAK 272  
G.z. -----PSQST-----PTR 271  
C.g. -----PSENT-----PTK 300  
S.m. -----PSNNE-----PAK 272  
M.o. -----PSQST-----PTK 277  
P.a. -----PSENT-----PTK 279  
F.o. -----PSQST-----PTR 275  
V.d. -----PSQST-----PTM 272  
A.n. PPLHTPSPMPSPPTAGAQPAAGAQPTDGGDIP----PKSSS-----KSN 318  
T.t. TTS----ESSNPPPHSEGNQEP---RPGQED----PRRPSSKDGIRS-----GIPKTS 314  
C.i. QTSTHLATSPSNIDPTLQTNDYSGANRRGNRR---QERTDTEQATQANNAGTTGIPKTS 324  
P.b. TSDQTMSP IPTPHDTTSEAI DDQSSDQPSPAQNPDGPKDAHANTSNTTDASSKHGIPKTS 354  
S.s. -----PLNGS-----PTT 264  
B.f. -----PLNGS-----PTT 269  
P.t. THRSSSPSRPTSSSGAPP-----HRPTT 305  
S.c. --AEEFAS TNGSSSENGMEGNS-----GYF 351  
K.l. --DEQFVPTSEETN-DDEMGNDK-----GY 350  
C.a. YSKENANGDGASSNNDDEDDG-----GTA 337  
S.p. ---LYDSLHPSPGGLKHQVLRITVIMIFYSP-----SNGAGQPAY 263  
U.m. -----PNATV 309  
C.n. -----EDRQH 220  
R.o. -----PETTT 179  
B.d. -----ILPVC 173

N.c. MIFTFLDDYRLDFSIRS-----LLGSR SRLQDVPKIAQLVE 308  
G.z. MIFNFLDDYRLDFSIRS-----LLGSR SRLQDVPKIAQLIE 307  
C.g. MTFTFLDDYRLDFSIRS-----LMGSR SRLQDVPKIAQLVE 336  
S.m. MIFTFLDDYRLDFSIRS-----LLGSR SRLQDVPKIAQLVE 308  
M.o. MVFNFLDDYRLDFSIRS-----LVGSR SRLQDVPKIAQLVE 313  
P.a. MTFTFLDDYRLDFSIRS-----LLGSR SRLQDVPKIAQLVE 315  
F.o. MIFNFLDDYRLDFEIRS-----LLGSR SKLHNVPKIAQLVE 311  
V.d. MTFNFLDDYRLDFSIGS-----LLGSR SKLEDVPKIAQLIE 308  
A.n. IAFSFLPDYRLDLSVRS-----LIGSR SRLQDVPKVAQLVE 354  
T.t. LAFSFLPDYRLDISVRS-----LIGSR SRLQDVPKVAQLVE 350  
C.i. LAFSFLPDYRLDLSVRS-----LIGSR SRLQDVPKVAQLVE 360  
P.b. LAFSFLPDYRLDLSVRS-----LIGSR SRLQDVPKVAQLVE 390  
S.s. LAFCFLLDDYRLDLSIRS-----LVGSR SRLQDVPKIAQLIE 300  
B.f. LAFCFLLDDYRLDLSIRS-----LVGSR SRLQDVPKIAQLIE 305  
P.t. LAFTFLDDYRLDLSVRS-----LVGSR SRLQDVPKIAQLIE 341  
S.c. LMFSFSPEYRMEFEIKS-----LIGSR SKLENIPKIGSVIE 387  
K.l. LMFSFNPEYRMELEVKS-----LIGSR SKLENIPKIASLIE 386  
C.a. LMFSFSPDYRLEFIVKS-----LIGSR AKLQDVPKISSLIE 373  
S.p. MNLSFDPNFVISLQVSS-----LVGAR SKLQDIPKITQLIE 299  
U.m. LPTANPNPSSSSSSSATSPPRSRHLHFSLHPDFALEASATSLIGSR AKLQDIPKIEQLLI 369  
C.n. IHVNLLPDFHLNLKVTS-----LLGSR AKLQDIPKLEQLIV 256  
R.o. KP-----KIPLERYIAI 191  
B.d. QQPLYKSQASETSTS-----DLGHHTYVSV 198

. : :

N.c. SRLHRWFDERC VEP RFQEIALPNMWP RKKNTRG---GDETISDVER-----S 352  
G.z. SRLHRWFDERAVEPRFQEIALPSLWPRKKNTRG---PDDGLAEGSV-----P 351  
C.g. SRLHRWFDERC VEP RFQEIALPSMWP RKKNTRG---GDEAIADAER-----S 380  
S.m. SRLHRWFDERC VEP RFQEIALPNMWP RKKNTRG---GDETISDVER-----S 352  
M.o. SRLHRWFDERC VEP RFQEIPLPSMWP RKKNARG---GDDAIADVER-----S 357  
P.a. SRLHRWFDERC VEP RFQEIELPSMWP RKKNTRG---GDEIIANIEQ-----S 359  
F.o. ARLHRWFDERAVEPRFQEIALPSLWPRKKNTRG---PEDASTERSE-----S 355  
V.d. ARLHRWFDERC VEP RFQEIALPSLWPRKKNTRG---PDDGMAEGNIG-----S 353  
A.n. ARVHAWFEERVVEPRVQVGLPDLWPRMGRTGVRT-GDESETGSNTASRPAMSVDMSS--S 411  
T.t. ARVQSWFEDRVVEPRVQLVALPGIWP RMGRTGVRA-QEDHDAVSDSDDP-EAKAAKSGFT 408  
C.i. ARVQAWFEERVVEPRVQVVALPGIWP RMGRTGVRG-QEEQQEVGSSGNAGVSTANVSMGL 419

P.b. ARVQSWFEERVVEPRVQVVLGPNIWPRMGRGTGLRSSQEEPEAGSGSVEIPVMTSPGADGV 450  
S.s. ARLHTWFDERCVEPRFQQIELPSLWPRKKNTRG---GEDLDTGSEAG-----G 345  
B.f. ARLHTWFDERCVEPRFQQIELPSLWPRKKNTRG---GEDLDTGSDAG-----G 350  
P.t. SRVHAWFDERAVEPRFQQIVLPSLWPRKHNTTRGGA-PEDTEAAVEGEEGLDEDDFAVDG 400  
S.c. YQIKKWFVERCVEPRFQFVRLPSMWPRSKNTR---EKPTL----- 426  
K.l. YQISKWFVERCVEPRFQFVKLPSMWPRSKNTRK---EKTDTDDSVS----- 429  
C.a. NQLRTWFIERCVEPRFQVRLPSLWPRKKNTRKREPVTKKTTTTPSTT----- 419  
S.p. SRIRQWFTNRQVSPQFQQIAIPNLWPTSAKEGHARSHAPQEESNED----- 346  
U.m. SRLRGWIMDRFVWPRYWSLTLPLNLVPSAASRSFSAAAAANRHTDAASVGSSSGGHGINV 429  
C.n. SRLRNLVQDRFVHPNHISLALPRILSPSVSSTPILEGLGEGAVDAMKDAVSDGMKRMVED 316  
R.o. SSYSDFILD-----LQIKVPNMWK----- 210  
B.d. SVLDDFLLD-----FDVRSLLG----- 215

. : . : :

N.c. MSKAKG-----VDIAKDVREEARKEIEAEAHGGADRV-----PDS 387  
G.z. IGRSKG-----RDASRPQ-EEARG---DAEIRDR-----GT 379  
C.g. MGKSKG-----MEMAKEMRTEARREVEAETDVRADRG-----HES 415  
S.m. MNKTKG-----VDIAKDVREEARKEIEAEAHGGADRV-----PDS 387  
M.o. MSKAKG-----ADVARDLR-----REVLVEAEARQAAQ-----RDS 388  
P.a. INKAHG-----GAIAKEAR---QELDTETDG----- 382  
F.o. IGRSRG-----NDAGRDHR-EEIRGRGGDAEIRDRGA-----GGT 389  
V.d. VGRSKG-----RDVQDIR-AEARK-EVEAEASSRTD-----RAQ 386  
A.n. PGHLQGD-----GGNHEEELFRFGLGPRPPLPFDVAVSRTSSYQVE-----TGA 454  
T.t. PVNANRD-----GPQTPRDLNMDGLRYRRNGGGQSTPDNYENLP-----QGD 451  
C.i. ARDAGAE-----GSHATRDADMEGLRYRRNASPGDETSQVRYSPQ-----NQD 462  
P.b. SGGGGSG-----GGSGGGGGMGRGIDRGLSGREAGYEALRYRHAA-----CGG 493  
S.s. IGRARS-----RDVERDLREEARKEVEAETGVRVGRSKLGVSLDVPDVGLD-GGS 394  
B.f. IGRARS-----RDVERDLREEARKEVEAETGIRVGRSKLGVSLDVPDE-----GS 395  
P.t. NGTAPGSTSYIPTPIAENATLEERIEAEGAKMREAEIRAGVRKPSASQERSRGRDDRAG 460  
S.c. -----  
K.l. -----VKSND----- 434  
C.a. -----VNGTSAATVTTTTPGEYVNSNI----- 439  
S.p. -----  
U.m. GTGVERTDASVIQPGHHE SARQEMLHAASERPS-----LASSRPPHVRSSSSGLRANGM 483  
C.n. FMGENPVEGALNGQEEQWLLDDDFPPTPLVQPPGTFPTLSVSSRQSHRQSLPPSRPQSTT 376  
R.o. -----EQEEQEE----- 217  
B.d. -----HRTKVKDLPKLTSLSISN-----SLRSVFISEMVFACKMIKIP 253

N.c. LRYRHRPRADEEFPGAGSMGSMG-SMP----- 415  
G.z. IRQRRGTRGSDSD--FSMPGSLPSFQIPTP----- 408  
C.g. LRYRRRPQTDDSFSTSGSMGSMPLDIPPT----- 445  
S.m. LRYRHRPRADEEFPGAGSMGSMG-SMP----- 415  
M.o. LRYRR-PRADDAFP---MPGSLAVDD----- 410  
P.a. LRYRRRPVGDYTSVSGSMGSLPGIDMPT----- 412  
F.o. VRHRRGTRSNDSDD--FSMPGSLPDFQVAAS----- 418  
V.d. ESLRR-RRLRSEDE--LIMPGSLPDFVQ----- 411  
A.n. PRSPSLTRERSLG-DDFHMPGSMPEAPGAQ----- 483  
T.t. GHPQPTSG-----EQFRIPGSLPGTSAIA----- 475  
C.i. SREQACRD-----DPFRIPGSLPDVVPVT----- 486  
P.b. HQNQSGRDGGRGNEQFAMPGSMPTVTET----- 523  
S.s. EEGLRFRRRSRGRGDEYAMPGSMPLSMA----- 423  
B.f. EDGLRFRRKSAGR-DEYAMPGSMPLSMT----- 423  
P.t. MRWRGEQRERTTGPRPKLQSRSTTTGIVKAI PGALPR----- 497  
S.c. -----  
K.l. -----  
C.a. -----  
S.p. -----  
U.m. GSVEAWRAHAAGVYNQPSHQHATSLNQAALLRAHVGGGGATDCAPGSDVNIEVPGSYRGS 543  
C.n. QGQPQLFYRRPLIHPTQSYPHYNTYTLDPQIPHVSYSRHPPRGSHVHNPETPVPQRPSH 436  
R.o. -----  
B.d. NGEELFGDIANAVDENSHDVFNLQENGSETLKSA----- 287

|      |                                          |     |
|------|------------------------------------------|-----|
| N.c. | -----                                    |     |
| G.z. | -----                                    |     |
| C.g. | -----                                    |     |
| S.m. | -----                                    |     |
| M.o. | -----                                    |     |
| P.a. | -----                                    |     |
| F.o. | -----                                    |     |
| V.d. | -----                                    |     |
| A.n. | -----                                    |     |
| T.t. | -----                                    |     |
| C.i. | -----                                    |     |
| P.b. | -----                                    |     |
| S.s. | -----                                    |     |
| B.f. | -----                                    |     |
| P.t. | -----                                    |     |
| S.c. | -----                                    |     |
| K.l. | -----                                    |     |
| C.a. | -----                                    |     |
| S.p. | -----                                    |     |
| U.m. | VAGAGIELASSNASSVLPTGAHHSSGLRNRPGFVQ---   | 579 |
| C.n. | GQGRMSTTSSLTPSQSQSQRFRFRGQFASGVTPGQVGTSR | 475 |
| R.o. | -----                                    |     |
| B.d. | -----                                    |     |
